# Supplementary material
Source: PubMed Central journal article supplement (PMC7103374)

Supp. Fig. 6 A

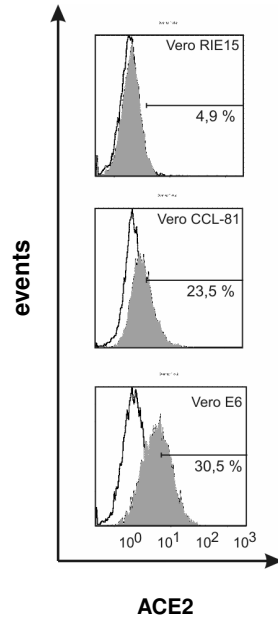

B

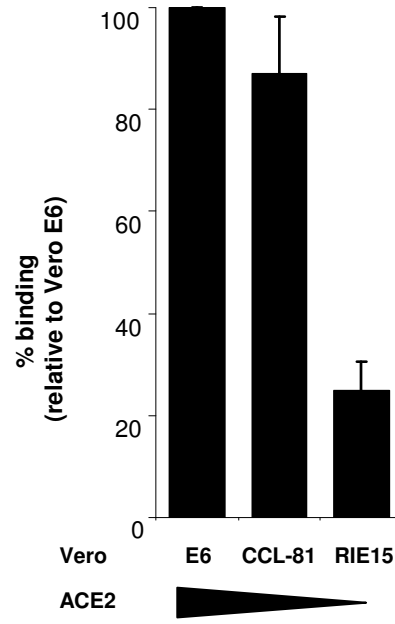

Supplement: mmc1.pdf [file mmc1.pdf]

# Supp. Fig. 7 A

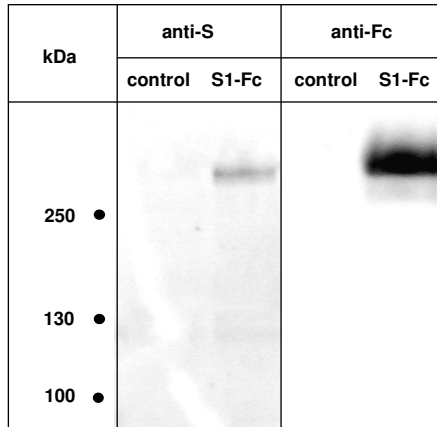

## B

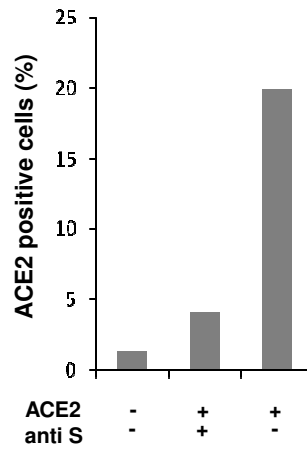

Supplement: mmc2.pdf [file mmc2.pdf]
